# Supplementary material for: Simulation of Neutron/Self-Emitted Gamma Attenuation and Effects of Silane Surface Treatment on Mechanical and Wear Resistance Properties of Sm2O3/UHMWPE Composites
Source: MDPI journal article supplement (doi:10.3390/polym13193390), 2021-10-02
Supplement: s1 [file s1]

# **Simulation of Neutron/Self-Emitted Gamma Attenuation and Effects of Silane Surface Treatment on Mechanical and Wear Resistance Properties of Sm<sub>2</sub>O<sub>3</sub>/UHMWPE Composites**

**Donrueedee Toyen<sup>1</sup>, Yupadee Paopun<sup>1</sup>, Dararat Changjan<sup>1</sup>, Ekachai Wimolmala<sup>2</sup>, Sithipong Mahathanabodee<sup>3</sup>, Theerasarn Pianpanit<sup>4</sup>, Thitisorn Anekratmontree<sup>4</sup> and Kiadtisak Saenboonruang<sup>4,5,\*</sup>**

<sup>1</sup> Scientific Equipment and Research Division, Kasetsart University Research and Development Institute (KURDI), Kasetsart University, Bangkok 10900, Thailand; rdiddt@ku.ac.th (D.T.), rdiydp@ku.ac.th (Y.P.), rdidrc@ku.ac.th (D.C.);

<sup>2</sup> Polymer PROcessing and Flow (P-PROF) Research Group, Division of Materials Technology, School of Energy, Environment and Materials, King Mongkut's University of Technology Thonburi, Bangkok 10140, Thailand; ekachai.wim@kmutt.ac.th (E.W.);

<sup>3</sup> Department of Production Engineering, Faculty of Engineering, King Mongkut's University of Technology North Bangkok, Bangkok 10800, Thailand; sithipong.m@eng.kmutnb.ac.th (S.M.);

<sup>4</sup> Department of Applied Radiation and Isotopes, Faculty of Science, Kasetsart University, Bangkok 10900, Thailand; fscitap@ku.ac.th (T.P.), thitisorn.an@ku.th (T.A.);

<sup>5</sup> Specialized Center of Rubber and Polymer Materials in Agriculture and Industry (RPM), Faculty of Science, Kasetsart University, Bangkok 10900, Thailand

\* Correspondence: kiadtisak.s@ku.th; Tel.: +662-562-5555 (ext. 646219)

**Table S1.** Comparative mass attenuation coefficients ( $\mu_m$ ) of Sm<sub>2</sub>O<sub>3</sub>/UHMWPE composites and their percentage of differences between the values determined from PHITS and XCOM at the gamma energies of 0.334, 0.712, and 0.737 MeV.

| Sm <sub>2</sub> O <sub>3</sub><br>content<br>(wt%.) | 0.334-MeV gamma rays |        |                   | 0.712-MeV gamma rays |        |                   | 0.737-MeV gamma rays |        |                   |
|-----------------------------------------------------|----------------------|--------|-------------------|----------------------|--------|-------------------|----------------------|--------|-------------------|
|                                                     | PHITS                | XCOM   | Difference<br>(%) | PHITS                | XCOM   | Difference<br>(%) | PHITS                | XCOM   | Difference<br>(%) |
| 0                                                   | 0.1187               | 0.1169 | 1.52              | 0.0861               | 0.0852 | 1.05              | 0.0847               | 0.0839 | 0.94              |
| 5                                                   | 0.1213               | 0.1200 | 1.07              | 0.0856               | 0.0849 | 0.82              | 0.0843               | 0.0835 | 0.95              |
| 10                                                  | 0.1243               | 0.1231 | 0.97              | 0.0857               | 0.0846 | 1.28              | 0.0841               | 0.0832 | 1.07              |
| 15                                                  | 0.1280               | 0.1263 | 1.33              | 0.0857               | 0.0842 | 1.75              | 0.0842               | 0.0828 | 1.66              |
| 20                                                  | 0.1301               | 0.1294 | 0.54              | 0.0846               | 0.0839 | 0.83              | 0.0832               | 0.0824 | 0.96              |
| 25                                                  | 0.1337               | 0.1325 | 0.90              | 0.0845               | 0.0836 | 1.07              | 0.0828               | 0.0820 | 0.97              |
| 30                                                  | 0.1363               | 0.1356 | 0.51              | 0.0840               | 0.0832 | 0.95              | 0.0823               | 0.0817 | 0.73              |
| 35                                                  | 0.1396               | 0.1388 | 0.57              | 0.0838               | 0.0829 | 1.07              | 0.0822               | 0.0813 | 1.09              |
| 40                                                  | 0.1425               | 0.1419 | 0.42              | 0.0833               | 0.0826 | 0.84              | 0.0816               | 0.0809 | 0.86              |
| 45                                                  | 0.1454               | 0.1450 | 0.28              | 0.0829               | 0.0822 | 0.84              | 0.0811               | 0.0805 | 0.74              |
| 50                                                  | 0.1490               | 0.1482 | 0.54              | 0.0821               | 0.0819 | 0.24              | 0.0809               | 0.0817 | 0.99              |
